# Supplementary material for: Performance of Olive-Pomace Oils in Discontinuous and Continuous Frying. Comparative Behavior with Sunflower Oils and High-Oleic Sunflower Oils
Source: MDPI journal article supplement (doi:10.3390/foods10123081), 2021-12-11
Supplement: s1 [file s1]

## ACCEPTABILITY TEST. Fried potatoes

### 1. Texture

|                          |                          |                          |                          |                          |                          |                          |                          |                          |
|--------------------------|--------------------------|--------------------------|--------------------------|--------------------------|--------------------------|--------------------------|--------------------------|--------------------------|
| Not crispy               |                          |                          |                          |                          |                          |                          |                          | Very crispy              |
| 1                        | 2                        | 3                        | 4                        | 5                        | 6                        | 7                        | 8                        | 9                        |
| <input type="checkbox"/> |

### 2. Oiliness

|                          |                          |                          |                          |                          |                          |                          |                          |                          |
|--------------------------|--------------------------|--------------------------|--------------------------|--------------------------|--------------------------|--------------------------|--------------------------|--------------------------|
| Not oily                 |                          |                          |                          |                          |                          |                          |                          | Very oily                |
| 1                        | 2                        | 3                        | 4                        | 5                        | 6                        | 7                        | 8                        | 9                        |
| <input type="checkbox"/> |

### 3. Taste

|                          |                          |                          |                          |                          |                          |                          |                          |                          |
|--------------------------|--------------------------|--------------------------|--------------------------|--------------------------|--------------------------|--------------------------|--------------------------|--------------------------|
| Dislike extremely        |                          |                          |                          |                          |                          |                          |                          | Like extremely           |
| 1                        | 2                        | 3                        | 4                        | 5                        | 6                        | 7                        | 8                        | 9                        |
| <input type="checkbox"/> |

### 4. Color

|                          |                          |                          |                          |                          |                          |                          |                          |                          |
|--------------------------|--------------------------|--------------------------|--------------------------|--------------------------|--------------------------|--------------------------|--------------------------|--------------------------|
| Very light               |                          |                          |                          |                          |                          |                          |                          | Very dark                |
| 1                        | 2                        | 3                        | 4                        | 5                        | 6                        | 7                        | 8                        | 9                        |
| <input type="checkbox"/> |

### 5. Global appreciation

|                          |                          |                          |                          |                          |                          |                          |                          |                          |
|--------------------------|--------------------------|--------------------------|--------------------------|--------------------------|--------------------------|--------------------------|--------------------------|--------------------------|
| Dislike extremely        |                          |                          |                          |                          |                          |                          |                          | Like extremely           |
| 1                        | 2                        | 3                        | 4                        | 5                        | 6                        | 7                        | 8                        | 9                        |
| <input type="checkbox"/> |

---

## Definition of attributes

- Texture is referred specifically to crispiness perception of the outer surface from the first bite and during mastication.
- Oiliness is referred to the gustatory perception of oil quantity on the surface and in the core.
- Taste is referred to the gustatory sensation in a hedonic scale expressing degree of dislike/like.
- Color is referred to description in terms of intensity.
- Global appreciation is the overall acceptability according to the attributes evaluated and any other, in a hedonic scale expressing degree of dislike/like.
