# Supplementary material for: Performance of Olive-Pomace Oils in Discontinuous and Continuous Frying. Comparative Behavior with Sunflower Oils and High-Oleic Sunflower Oils
Source: MDPI journal article supplement (doi:10.3390/foods10123081), 2021-12-11
Supplement: s1 [file s1]

Figure S2. Analysis of phenolic compounds (335 nm) in olive-pomace oil (OPO2)

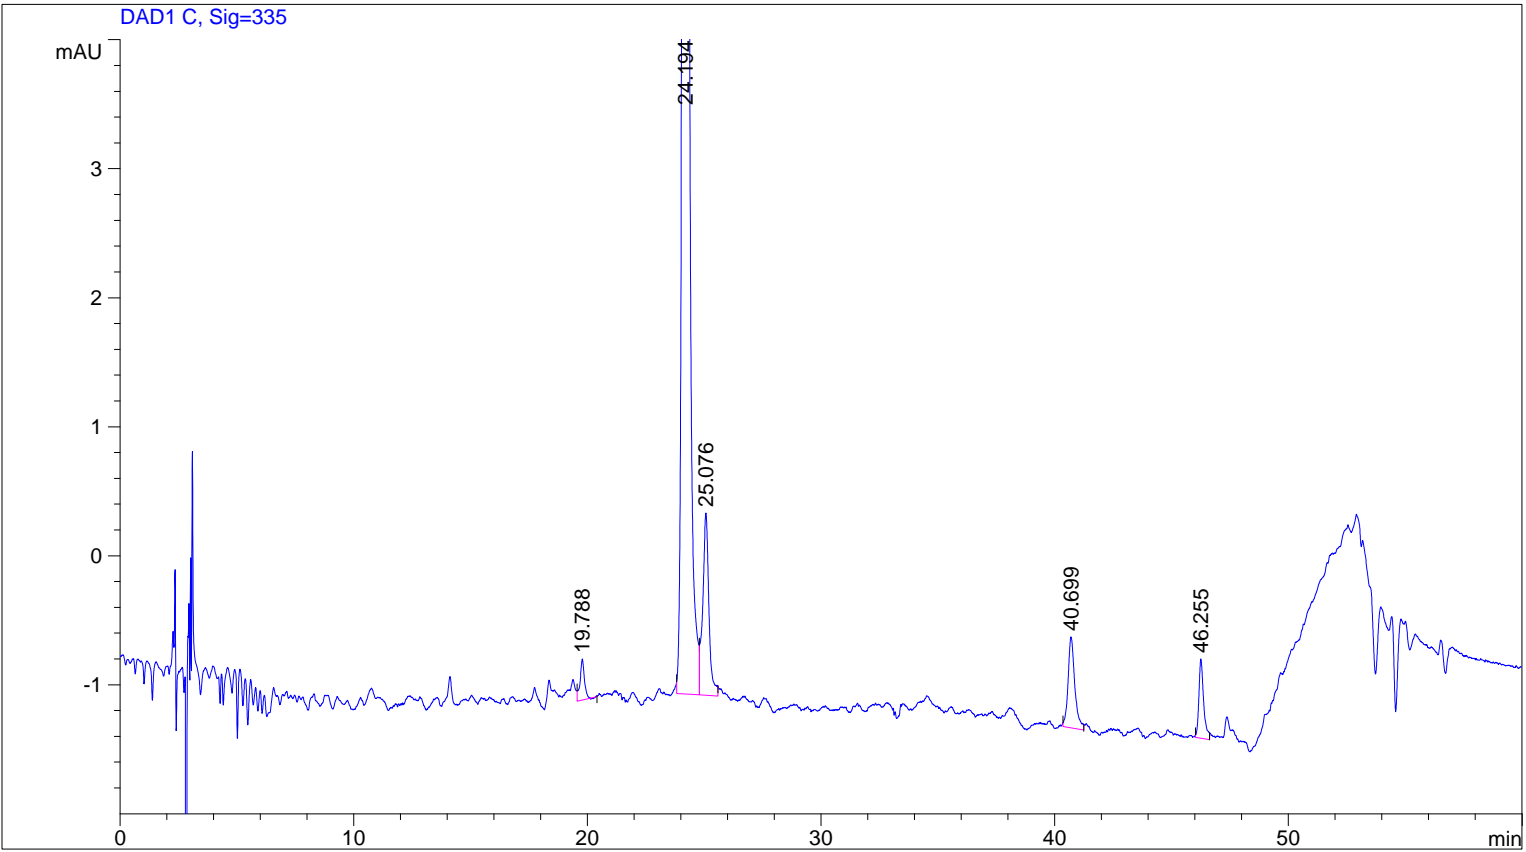

=====  
Area Percent Report  
=====

Sorted By : Signal  
Multiplier : 1.0000  
Dilution : 1.0000  
Use Multiplier & Dilution Factor with ISTDs

Signal 1: DAD1 C, Sig=335,16 Ref=550,80, TT

| Peak # | RetTime [min] | Type | Width [min] | Area [mAU*s] | Height [mAU] | Area %  |
|--------|---------------|------|-------------|--------------|--------------|---------|
| 1      | 19.788        | VB   | 0.1914      | 4.13978      | 3.18970e-1   | 0.8213  |
| 2      | 24.194        | BV   | 0.2093      | 450.87811    | 32.61849     | 89.4474 |
| 3      | 25.076        | VB   | 0.2725      | 26.21488     | 1.41256      | 5.2006  |
| 4      | 40.699        | BB   | 0.3018      | 14.12973     | 7.05096e-1   | 2.8031  |
| 5      | 46.255        | BB   | 0.2130      | 8.70830      | 6.15853e-1   | 1.7276  |

Totals : 504.07079 35.67097

=====  
\*\*\* End of Report \*\*\*
