# Supplementary material for: Performance of Olive-Pomace Oils in Discontinuous and Continuous Frying. Comparative Behavior with Sunflower Oils and High-Oleic Sunflower Oils
Source: MDPI journal article supplement (doi:10.3390/foods10123081), 2021-12-11
Supplement: s1 [file s1]

Figure S1. Analysis of phenolic compounds (280 nm) in olive-pomace oil (OPO2).

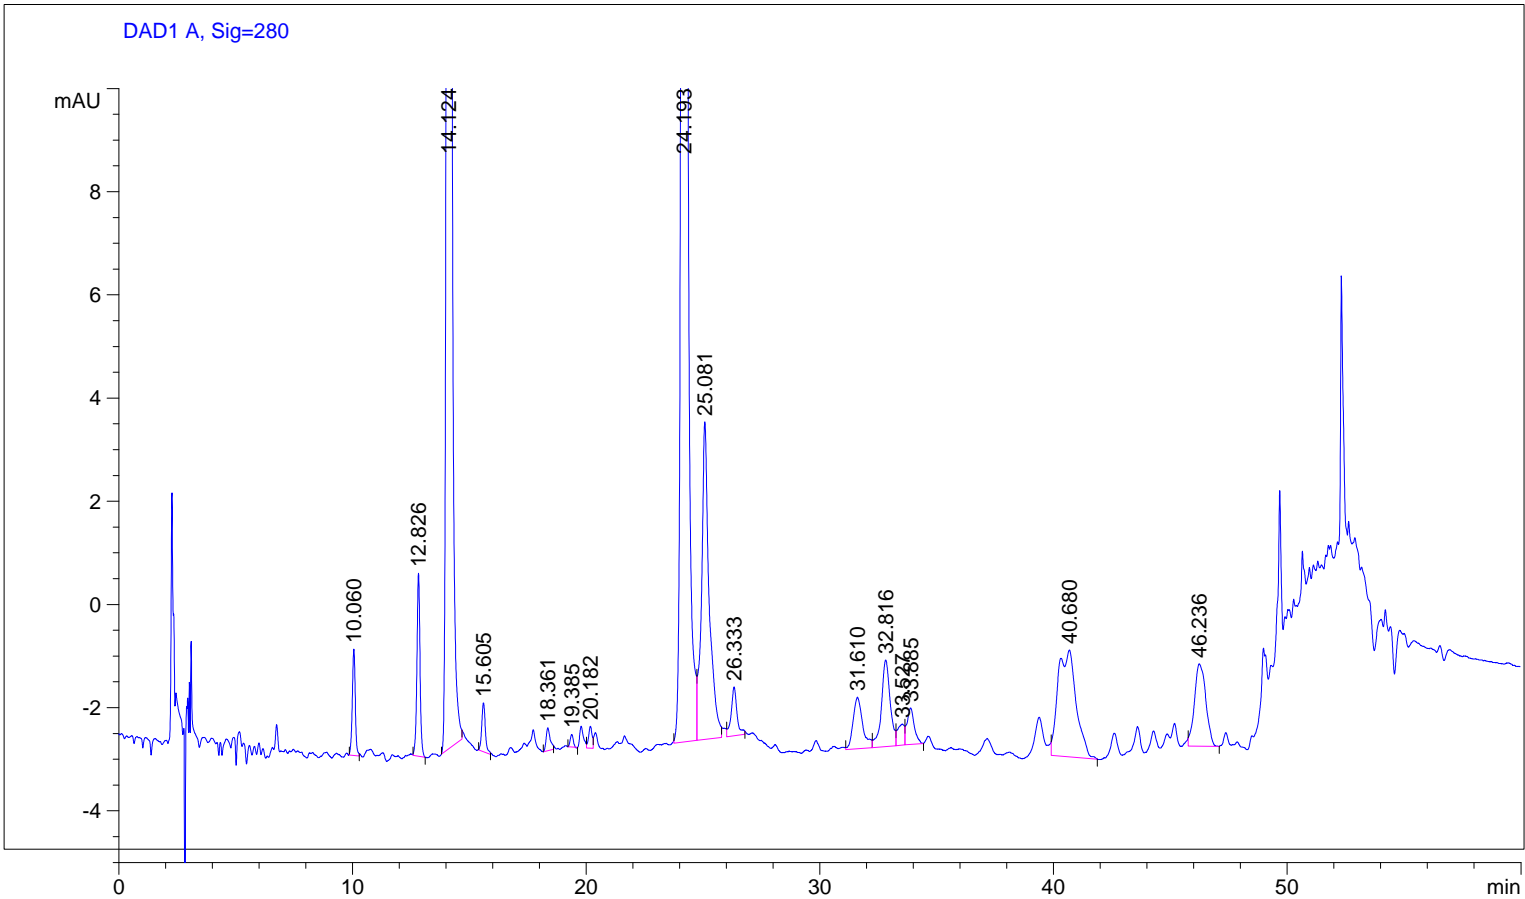

Area Percent Report

Sorted By : Signal  
Multiplier : 1.0000  
Dilution : 1.0000  
Use Multiplier & Dilution Factor with ISTDs

Signal 1: DAD1 A, Sig=280,16 Ref=550,80, TT

| Peak # | RetTime [min] | Type | Width [min] | Area [mAU*s] | Height [mAU] | Area %  |
|--------|---------------|------|-------------|--------------|--------------|---------|
| 1      | 10.060        | BB   | 0.1351      | 18.26189     | 2.06635      | 0.7200  |
| 2      | 12.826        | BP   | 0.1372      | 32.59294     | 3.54811      | 1.2850  |
| 3      | 14.124        | PB   | 0.1422      | 1141.78223   | 120.92918    | 45.0166 |
| 4      | 15.605        | BB   | 0.1593      | 10.04263     | 9.50241e-1   | 0.3959  |
| 5      | 18.361        | PB   | 0.1719      | 5.34544      | 4.45836e-1   | 0.2108  |
| 6      | 19.385        | PP   | 0.1314      | 2.18873      | 2.46866e-1   | 0.0863  |
| 7      | 20.182        | BV   | 0.1537      | 4.42900      | 4.24647e-1   | 0.1746  |
| 8      | 24.193        | BV   | 0.2099      | 902.31293    | 65.03934     | 35.5752 |
| 9      | 25.081        | VB   | 0.3200      | 141.40019    | 6.15636      | 5.5749  |
| 10     | 26.333        | BB   | 0.2563      | 16.39130     | 9.45447e-1   | 0.6463  |
| 11     | 31.610        | BV   | 0.4263      | 28.47864     | 9.99734e-1   | 1.1228  |
| 12     | 32.816        | VV   | 0.3872      | 43.84283     | 1.67594      | 1.7286  |
| 13     | 33.527        | VV   | 0.2571      | 8.31255      | 4.09098e-1   | 0.3277  |
| 14     | 33.885        | VP   | 0.3201      | 15.22804     | 7.10366e-1   | 0.6004  |
| 15     | 40.680        | BP   | 0.7010      | 111.68678    | 2.07165      | 4.4034  |
| 16     | 46.236        | BP   | 0.4565      | 54.06065     | 1.59889      | 2.1314  |

Totals : 2536.35678 208.21805

\*\*\* End of Report \*\*\*
